# Supplementary material for: E2F1 and epigenetic modifiers orchestrate breast cancer progression by regulating oxygen-dependent ESRP1 expression
Source: PubMed Central journal article supplement (PMC8346533; doi:10.1038/s41389-021-00347-6), 2021-08-06
Supplement: 41389_2021_347_MOESM1_ESM.pdf [file 41389_2021_347_MOESM1_ESM.pdf]

1 **E2F1 and epigenetic modifiers orchestrate breast cancer**  
 2 **progression by regulating oxygen-dependent ESRP1 expression**

3 Cheemala Ashok<sup>1,†</sup>, Neha Ahuja<sup>1,†</sup>, Subhashis Natua<sup>1</sup>, Jharna Mishra<sup>2</sup>, Atul  
 4 Samaiya<sup>3</sup> and Sanjeev Shukla<sup>1,\*</sup>

5

6 **Supplementary Information**

7 **Supplementary Table S1.** Alternative splicing events of ESRP1 target genes in MCF7 and  
 8 HCC1806 cells. (Normoxia versus Hypoxia) and (shcontrol versus shTET3)<sup>1</sup>.

| Gene symbol     | Type of ASE in Warzecha et al <sup>1</sup> in low ESRP1 | Normal vs Hypoxia MCF7 | shcontrol vs shTET3 MCF7 | Normal vs Hypoxia HCC1806 | shcontrol vs shTET3 HCC1806 |
|-----------------|---------------------------------------------------------|------------------------|--------------------------|---------------------------|-----------------------------|
| <i>hMENA</i>    | Skip                                                    | Skip                   | Skip                     | Skip                      | Skip                        |
| <i>SLK</i>      | Skip                                                    | Skip                   | Skip                     | Skip                      | Skip                        |
| <i>SCRIB</i>    | Inc                                                     | Skip                   | Skip                     | Skip                      | Inc                         |
| <i>RALGPS2</i>  | Skip                                                    | Skip                   | Skip                     | Skip                      | Skip                        |
| <i>SLC37A2</i>  | Skip                                                    | Skip                   | Skip                     | Skip                      | Skip                        |
| <i>FNIP1</i>    | Skip                                                    | Skip                   | Skip                     | Skip                      | Skip                        |
| <i>CD44</i>     | NC                                                      | Skip                   | Skip                     | Skip                      | Skip                        |
| <i>ARHGEF11</i> | Inc                                                     | Inc                    | Inc                      | Inc                       | Inc                         |

9

10 **Supplementary Table S2.** Oligo sequence of shRNAs.

|           |                                                           |
|-----------|-----------------------------------------------------------|
| shControl | CCGGCGCTGAGTACTTCGAAATGTCCTCGAGGACATTTTGAAGTACTCAGCGTTTTT |
| shDNMT1   | CCGGCGACTACATCAAAGGCAGCAACTCGAGTTGCTGCCTTTGATGTAGTCGTTTTT |
| shDMNT3A  | CCGGCCACCAGAAGAAGAGAAGAATCTCGAGATTCTTCTTCTTCTGGTGGTTTTTG  |

|          |                                                             |
|----------|-------------------------------------------------------------|
| shDNMT3B | CCGGCCATGCAACGATCTCTCAAATCTCGAGATTTGAGAGATCGTTGCATGGTTTTTG  |
| shTET1   | CCGGCCTATATGTATGGCACAATATCTCGAGATATTGTGCCATACATATAGGTTTTTG  |
| shTET2   | CCGGCCTCAAGCATAACCCACCAATCTCGAGATTGGTGGGTTATGCTTGAGGTTTTTTG |
| shTET3   | CCGGGAACCTTCTCTTGCCTATTTCTCGAGAAATAGCGCAAGAGAAGGTTCTTTTTG   |

11

12 **Supplementary Table S3.** List of primers used in ESRP1 cloning.

| S.NO | Primers          | Sequence                          |
|------|------------------|-----------------------------------|
| 1    | ESRP1- BamHIF    | CGGGATCCATGACGGCTCTCCGGATTA       |
| 2    | ESRP1- HindIII R | CCCAAGCTTTTAAATACAAACCCATTCTTTGGG |

13

14 **Supplementary Table S4.** List of primers used in ESRP1 promoter cloning.

| S.NO | Primers        | Sequence                     |
|------|----------------|------------------------------|
| 1    | ESRP1-1692 Fw  | GGGGTACCCGCCTCCGCCTGCACCTTCT |
| 2    | ESRP1- 1482 Fw | GGGGTACCGGCTGGACACCTAGAGCCGA |
| 3    | ESRP1- 793 Fw  | GGGGTACCGGCTCGCAGGATTTCTCCTG |
| 4    | ESRP1- 472 Fw  | GGGGTACCGAGCCCTTACCTCTCTGAGC |
| 5    | ESRP1- 325 Fw  | GGGGTACCCTCCCCCTCCCGAAGCGGCC |
| 6    | ESRP1-144 Fw   | GGGGTACCGCAGCCTTGCTCCAGGCTT  |
| 7    | ESRP1+110 Rev  | CGGCTAGCAGGCGGTAAGGTGGTGTGGA |

15

16 **Supplementary Table S5.** List of primers used in site directed mutagenesis (SDM).

| S.NO | Primers      | Sequence                         |
|------|--------------|----------------------------------|
| 1    | E2F1 SDM Fw  | CCAGCCATTGTCTAAATCCCCTTCCTCCCCCT |
| 2    | ESF1 SDM Rev | AGGGGGAGGAAGGGGATTTAGACAATGGCTGG |

17

18 **Supplementary Table S6.** List of primers used in Chromatin immunoprecipitation (ChIP),  
 19 MeDIP and hMeDIP.

| S.NO | Primers            | Sequence              |
|------|--------------------|-----------------------|
| 1    | ESRP1 promoter Fw  | GAGCCCTTTACCTCTCTGAGC |
| 2    | ESRP1 promoter Rev | TTCAAACCACGACGTGGCAGC |
| 3    | SRSF7 promoter Fw  | GAGCTGGAGTCTTGGGCGAG  |
| 4    | SRSF7 promoter Rev | ACCCATGAGTCCCGGCAG    |

20

21 **Supplementary Table S7.** List of Oligo sequences utilized for CRISPR/Cas9-mediated  
 22 knockout.

| S.NO | Primers        | Sequence                  |
|------|----------------|---------------------------|
| 1    | sgRNA E2F1 Fw  | CACCGGGAGATGATGACGATCTGCG |
| 2    | sgRNA E2F1 Rev | AAACCGCAGATCGTCATCATCTCCC |

23

24 **Supplementary Table S8.** List of antibodies utilized for Immunohistochemistry, and  
 25 Immunoblotting.

| S.No | Antibody       | Company              | Catalog no         | Lot no                 |
|------|----------------|----------------------|--------------------|------------------------|
| 1    | GAPDH (D16h11) | CST                  | 5174S              | 7                      |
| 2    | RBM35A (ESRP1) | Abcam                | ab107278           | GR279719-9             |
| 3    | E2F1           | Abcam<br>Sigma       | ab179445<br>05-379 | GR155150-29<br>3280452 |
| 4    | DNMT1          | Abcam                | ab87656            | GR215476-4             |
| 5    | DNMT3A         | Abcam                | ab2805             | GR218985-4             |
| 6    | DNMT3B         | R&D systems          | MAB7646            | CHLT0115041            |
| 7    | TET1           | Novus<br>Biologicals | NBP215135          | 41386                  |

|    |                                 |                      |           |             |
|----|---------------------------------|----------------------|-----------|-------------|
| 8  | TET2                            | CST                  | 45010     | 1           |
| 9  | TET3                            | Novus<br>Biologicals | NBP220602 | 41185       |
| 10 | HIF-1 $\alpha$ (D2U3T)          | CST                  | 14179S    | 3           |
| 11 | SRSF7                           | Abcam                | ab170679  | GR179666-4  |
| 12 | HNRPA2/B1                       | Abcam                | ab6102    | GR125277-56 |
| 13 | Normal Rabbit IgG               | CST                  | 2729S     | 8           |
| 14 | Normal Mouse IgG                | CST                  | 5415S     | 10          |
| 15 | 5-Methylcytosine (5-mC)         | CST                  | D3S27     | 1           |
| 16 | 5-Hydroxymethylcytosine (5-hmC) | CST                  | 51660S    | 1           |
| 17 | Alexa-Flour 680 anti-rabbit IgG | Invitrogen           | A32734    | RJ243414    |
| 18 | Alexa-Flour 800 anti-mouse IgG  | Invitrogen           | A32730    | SC243837    |
| 19 | HNRNP LL                        | CST                  | 4783S     | 2           |
| 20 | HNRNP U                         | abcam                | ab172608  | YK030623CS  |
| 21 | HNRNP K                         | CST                  | 9081S     | 1           |
| 22 | HNRNP M1-M4                     | abcam                | ab177957  | GR141541-3  |
| 23 | HNRNP H                         | abcam                | ab10374   | GR250291-24 |
| 24 | RBM5                            | abcam                | ab85504   | GR16494-7   |
| 25 | CAIX                            | abcam                | ab184006  | GR173128-25 |

26

27 **Supplementary Table S9.** List of primer sequences utilized for Semi-quantitative PCR.

| S.NO | Primers   | Sequence                  |
|------|-----------|---------------------------|
| 1    | RPS16 Fw  | AAACGCGGCAATGGTCTCATCAAG  |
| 2    | RPS16 Rev | TGGAGATGGACTGACGGATAGCAT  |
| 3    | hMENA Fw  | GAATTGCTGAAAAGGGATC       |
| 4    | hMENA Rev | CTGTTCCCTCTATGCAGTATTTGAC |
| 5    | SLK Fw    | TTGAGCAGGAAATGATGAGGAAAA  |

|    |              |                            |
|----|--------------|----------------------------|
| 6  | SLK Rev      | CTGCCTTCTGCTGCTGGATGA      |
| 7  | SCRIB Fw     | GACAAGGAGGGGGCCGTGGTTTCT   |
| 8  | SCRIB Rev    | TATGCCCTCGTCGTCCCCCTTAT    |
| 9  | RALGPS2 Fw   | AGACCTCATGGCCTGCTTTTGAAA   |
| 10 | RALGPS2 Rev  | TGTAGGCTTTTTGCCTTCTTTTAA   |
| 11 | SLC37A2 Fw   | CTGGAAGGTGTCCCTGAGCA       |
| 12 | SLC37A2 Rev  | TGAACAAGCAAGAGTCTGAGCA     |
| 13 | FNIP1 Fw     | AACACAGTTATTAATGGACTGCTTGG |
| 14 | FNIP1 Rev    | GTGCTATGCCACTGTCTCTGTC     |
| 15 | CD44 Fw      | CTCCACCTGAAGAAGATTGTACATC  |
| 16 | CD44 Rev     | TCAGATCCATGAGTGGTATGGGACC  |
| 17 | ARHGEF11 Fw  | GGCAGCAGGAGGTTACAAAGTT     |
| 18 | ARHGEF11 Rev | TGAGTGGTCCGGTGCTTGAGTC     |
| 19 | FAS Fw       | CACCAAGTGCAAAGAGGAAG       |
| 20 | FAS Rev      | GGAGATTCATGAGAACCTTGG      |
| 21 | Tau Fw       | CAACGCCACCAGGATTCCAGCAAA   |
| 22 | Tau Rev      | ATGTTGCCTAATGAGCCCACTTG    |

28

29 **Supplementary Table S11.** Clinical characteristics of patients

| S.No | Patient No. | Histopathology                                     | Estrogen (ER), Progesterone (PR), Her2<br>Status |
|------|-------------|----------------------------------------------------|--------------------------------------------------|
| 1    | Patient 1   | Carcinoma ypT4N0Mx                                 | ER(-ve) PR(-ve) Her2(weak+ve)                    |
| 2    | Patient 2   | Infiltrating duct carcinoma pT2N0Mx                | ER(weak+ve) PR(weak+ve) Her2(-ve)                |
| 3    | Patient 3   | Infiltrating duct<br>carcinoma Grade II pT2N1Mx    | ER(-ve) PR(-ve) Her2(+ve)                        |
| 4    | Patient 4   | Infiltrating duct<br>carcinoma Grade II<br>pT3N2Mx | ER(+ve) PR(+ve) Her2(-ve)                        |

|    |            |                                                                     |                                          |
|----|------------|---------------------------------------------------------------------|------------------------------------------|
| 5  | Patient 5  | Infiltrating duct carcinoma Grade I<br>pT2N0Mx                      | ER(+ve) PR(+ve) Her2(-ve)                |
| 6  | Patient 6  | Infiltrating duct carcinoma NOS type<br>grade II Left Breast        | ER(weak+ve) PR(+ve) Her2(+ve)            |
| 7  | Patient 7  | Infiltrating duct carcinoma GradeII<br>pT2N0Mx                      | ER(+ve) PR(+ve) Her2(-ve)                |
| 8  | Patient 8  | Infiltrating duct Carcinoma pT2N0Mx                                 | ER(+ve) PR(weak+ve) Her2(-ve)            |
| 9  | Patient 9  | Grade III invasive Duct Carcinoma                                   | -                                        |
| 10 | Patient 10 | Invasive Duct Carcinoma                                             | -                                        |
| 11 | Patient 11 | Infiltrating Duct Carcinoma                                         | -                                        |
| 12 | Patient 12 | Infiltrating Duct Carcinoma Grade II<br>pT3N0Mx                     | -                                        |
| 13 | Patient 13 | Infiltrating duct carcinoma grade III<br>Pathological stage pT3N0Mx | ER(-ve) PR(-ve) Her2(-ve)                |
| 14 | Patient 14 | Mucinous carcinoma pT2SnN0Mx                                        | ER(+ve) PR(+ve) Her2(-ve)                |
| 15 | Patient 15 | Mixed metaplastic carcinoma<br>pathological stage pT3N0Mx           | ER( Weak +ve) PR(moderate +ve) Her2(-ve) |
| 16 | Patient 16 | Invasive carcinoma, grade II, pT2N0Mx                               | ER(+ve) PR(+ve) Her2(equivocal)          |
| 17 | Patient 17 | Invasive carcinoma, grade II, pT2N0Mx                               | ER(-ve) PR(-ve) Her2(-ve)                |
| 18 | Patient 18 | Invasive carcinoma, grade II, pT2N1Mx                               | ER(+ve) PR(+ve) Her2(-ve)                |
| 19 | Patient 19 | Invasive carcinoma, grade III, pT2N2Mx                              | ER(-ve) PR(-ve) Her2(+ve)                |

30

### 31 Reference

32 1 Warzecha CC *et al* (2010). An ESRP - regulated splicing programme is abrogated during the  
33 epithelial-mesenchymal transition. *The EMBO journal* **29**: 3286-3300.

34

## 35 Supplementary Figures

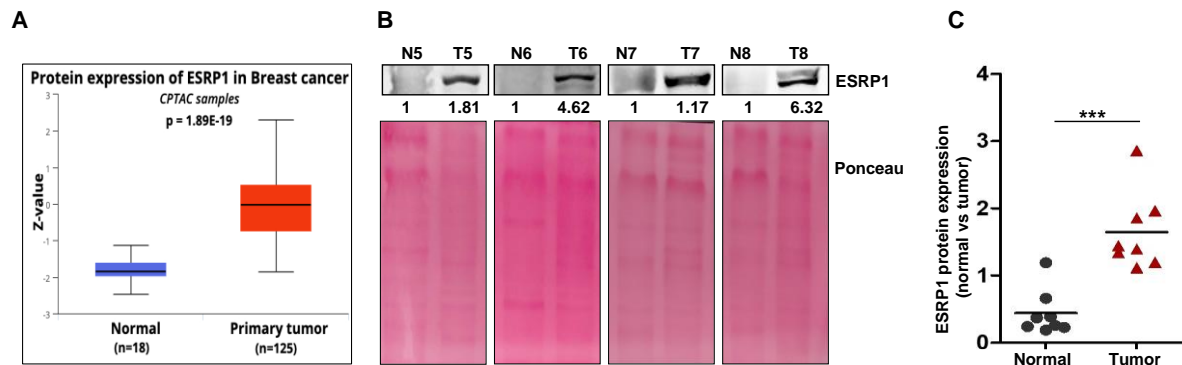

36 **Supplementary Figure S1. ESRP1 is upregulated in primary breast tumors and is associated with**  
37 **a poor prognosis.** (A) The Clinical Proteomic Tumor Analysis Consortium (CPTAC) data for ESRP1  
38 pertaining to normal breast tissue and primary breast tumor, obtained from the UALCAN platform. (B)  
39 Immunoblot of ESRP1 in normal versus breast cancer tissue. (C) Quantification for ESRP1 protein  
40 expression for breast tumor versus normal tissues of 8 breast cancer patients ( $n = 8, P = 0.0002$ ).

41

42

43

44

45

46

47

48

49

50

51

52

53

54

55

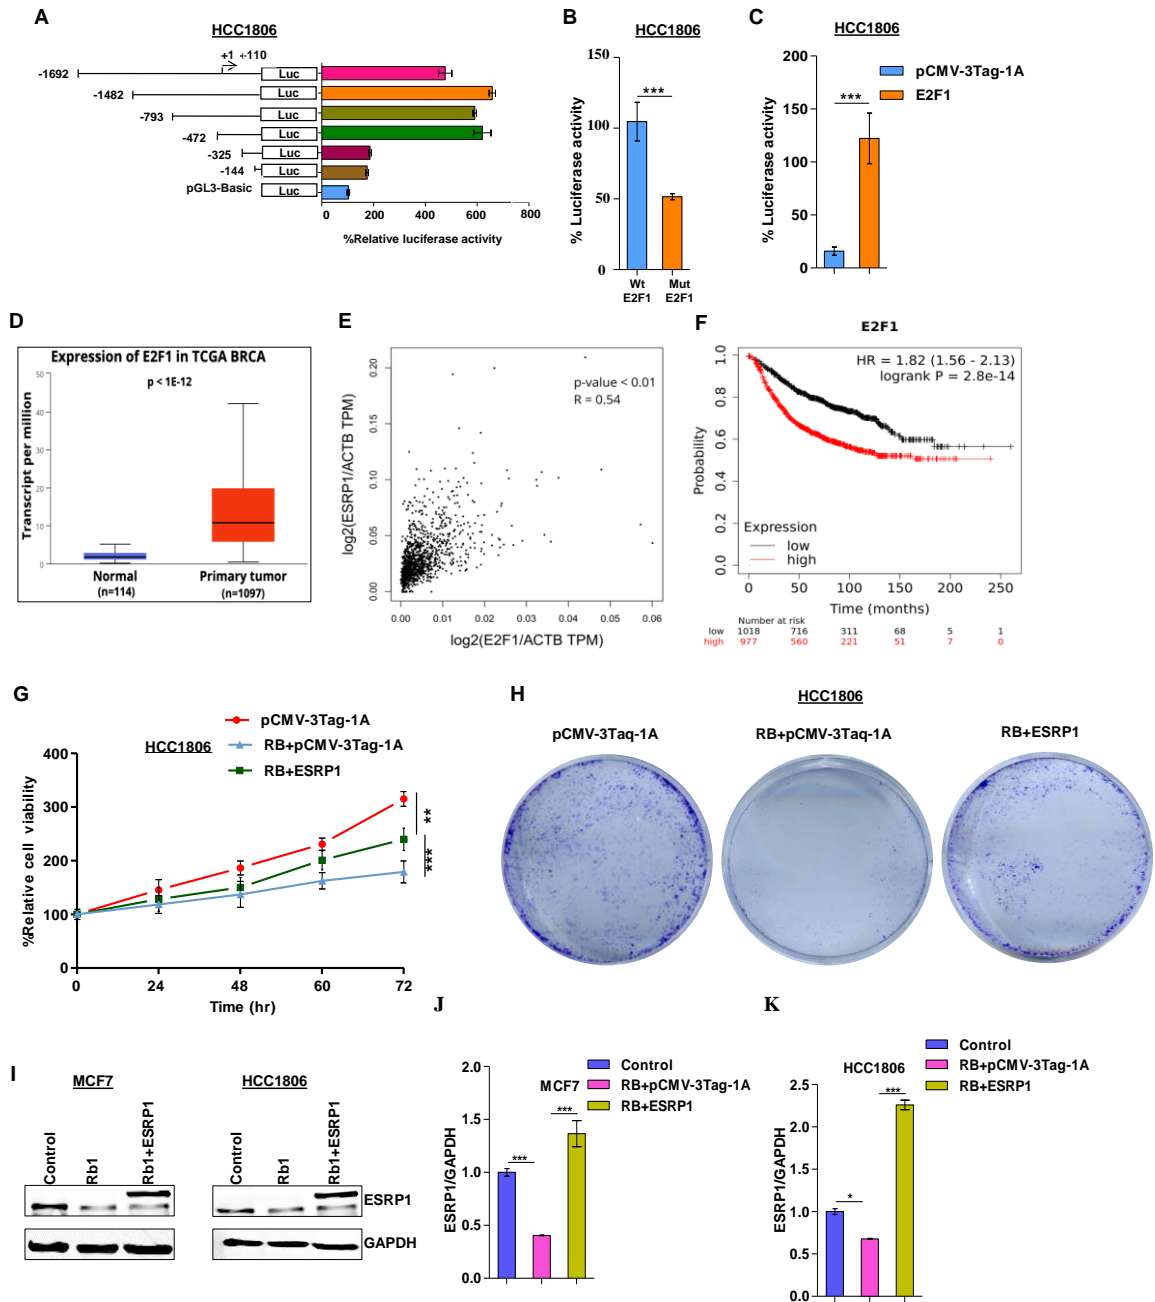

56 **Supplementary Figure S2. Transcription factor E2F1 is indispensable for ESRP1-mediated**  
 57 **breast carcinogenesis. (A)** Schematic representation of human *ESRP1* promoter analysis in HCC1806  
 58 cells. Numbers indicate the position of primers. +1 indicates transcription start site. Deletion constructs  
 59 of different *ESRP1* promoters and their luciferase activities are shown. **(B)** Wild-type or mutant E2F1  
 60 luciferase reporter constructs were co-transfected with the Renilla luciferase vector in HCC1806 cells,  
 61 and the luciferase activity was measured after 24 h of transfection. The luciferase values are shown as  
 62 mean  $\pm$  SD. **(C)** HCC1806 cells were co-transfected with ESRP1 (-472/+110 bp) promoter construct



63 along with pCMV-3Tag-1A-E2F1 plasmid or pCMV-3Tag-1A as a control. The luciferase activities  
64 were measured and the relative luciferase values are shown. Error bars show mean values  $\pm$  SD ( $n = 3$   
65 unless otherwise specified) calculated using two-tailed Student's *t*-test, \*\*\* $P < 0.001$ . **(D)** TCGA gene  
66 expression profile of E2F1 pertaining to normal breast tissue and primary breast tumor obtained from  
67 the UALCAN platform ( $P = 1E-12$ ). **(E)** The Pearson's correlation analysis between mRNA expression  
68 of E2F1 and ESRP1 normalized to  $\beta$ -Actin from GEPIA web tool using TCGA BRCA and GTex  
69 database ( $P < 0.01$ ,  $R = 0.54$ ). **(F)** Kaplan-Meier Plot for relapse free survival of breast cancer patient  
70 comparing the upper (red) and lower (black) quartile E2F1 expression (Affy ID: 204947\_at) obtained  
71 from [www.kmplot.com](http://www.kmplot.com) (Logrank  $P = 2.8E-14$  , Hazard ratio = 1.82 (1.56-2.13)). **(G)** Relative cell  
72 proliferation was analyzed through MTT assay ( $n = 3$ ) in HCC1806. **(H)** Colony-formation assay of  
73 HCC1806 cells transfected with the indicated expression vectors were seeded on 6-well plates and after  
74 2 weeks, the colonies were stained with crystal violet. **(I)** Immunoblot of ESRP1 to confirm  
75 overexpression of ESRP1 in MCF7 and HCC1806 cells. **(J and K)** Densitometric analysis of  
76 representative blots. Error bars show mean values  $\pm$  SD ( $n = 3$  unless otherwise specified) calculated  
77 using two-tailed Student's *t*-test, \* $P < 0.05$ , \*\* $P < 0.01$  and \*\*\* $P < 0.001$ .

78

79

80

81

82

83

84

85

86

87

88

89

90

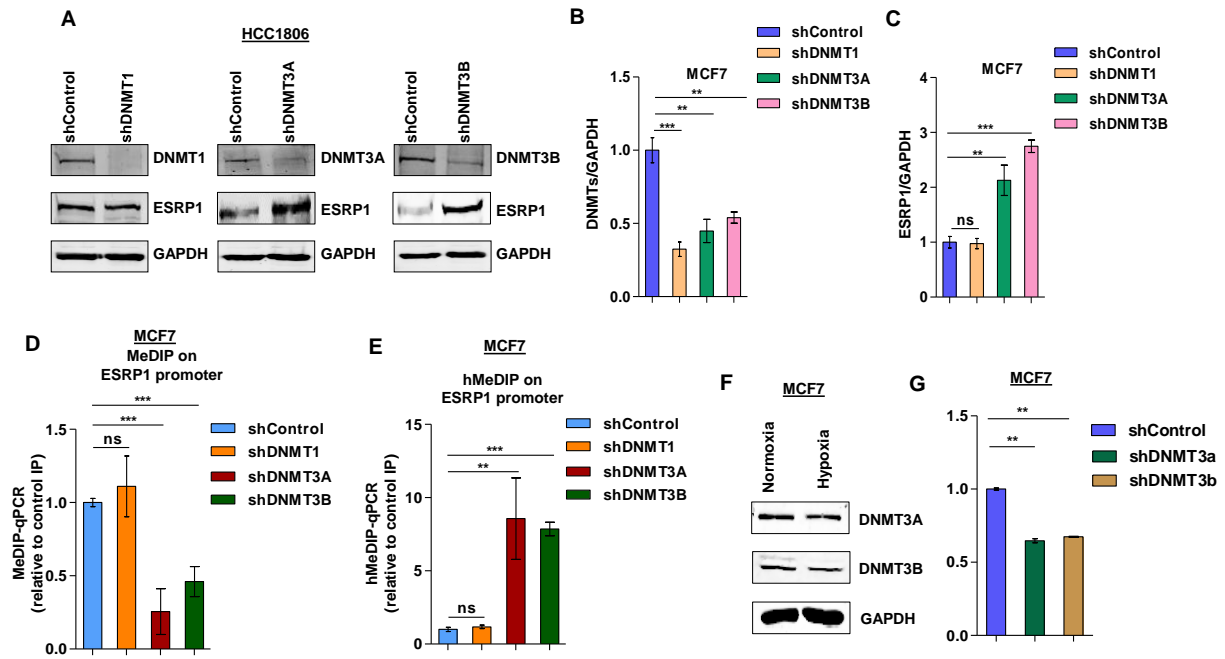

91 **Supplementary Figure S3. Hypermethylated binding motif repels E2F1 from the ESRP1**  
 92 **promoter in hypoxic breast cancer. increased DNA methylation. (A)** Immunoblots of DNMT1,  
 93 DNMT3A, DNMT3B, and ESRP1 protein expression in shDNMT1, shDNMT3A, shDNMT3B, and  
 94 shcontrol HCC1806 cells under hypoxic condition. **(B and C)** Densitometric analysis of representative  
 95 blots compared to shControl normalized to one. **(D)** MeDIP in MCF7 cells transfected with shRNA  
 96 against DNMT1, DNMT3A, DNMT3B versus shcontrol cells under hypoxia, followed by qRT-PCR  
 97 relative to input and control IgG ( $n = 3$ ). **(E)** hMeDIP in MCF7 cells transfected with shRNA  
 98 against DNMT1, DNMT3A, DNMT3B versus shcontrol cells under hypoxia, followed by qRT-PCR  
 99 relative to input and control IgG ( $n = 3$ ). **(F)** Immunoblots of DNMT3a and DNMT3b protein  
 100 expression in MCF7 cells under normoxic vs hypoxic condition. **(G)** Densitometric analysis  
 101 of representative blots compared to shControl normalized to one. Error bars show mean values  $\pm$  SD ( $n = 3$  unless otherwise  
 102 specified) calculated using two-tailed Student's *t*-test, ns (non significant),  $**P < 0.01$  and  $***P <$   
 103 0.001.

104

105

106

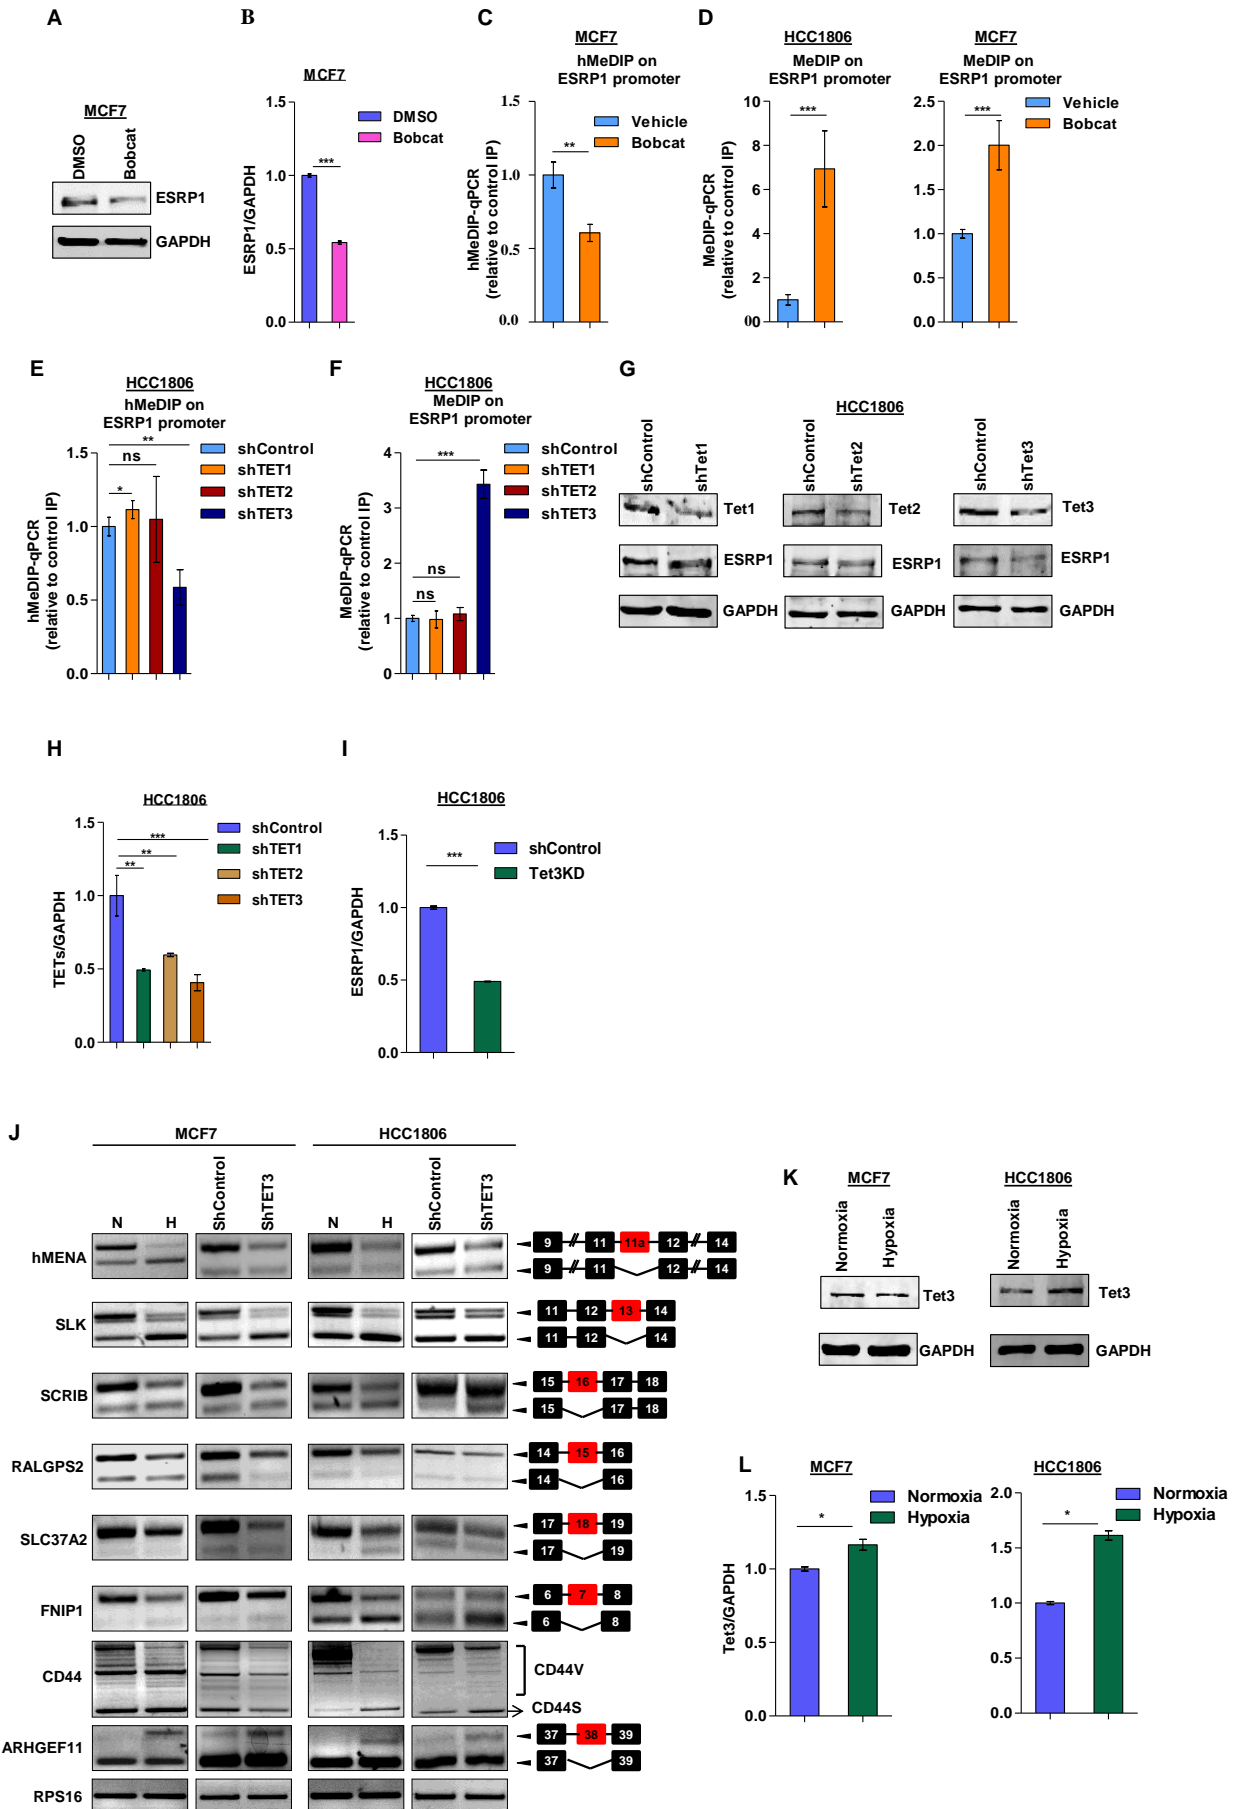

108 **Supplementary Figure S4. Reduced CpG hydroxymethylation at the E2F1 binding motif**  
109 **contributes to ESRP1 downregulation under hypoxia. (A)** Immunoblots of ESRP1 after bobcat (70-  
110 90  $\mu$ M) treatment under normoxia in MCF7 cells. **(B)** Densitometric analysis of representative blots.  
111 **(C)** hMeDIP in MCF7 cells after bobcat (70-90  $\mu$ M) treatment under normoxia, followed by qRT-PCR  
112 relative to input and control IgG ( $n = 3$ ). **(D)** MeDIP in HCC1806 and MCF7 cells after bobcat (70-90  
113  $\mu$ M) treatment under normoxia, followed by qRT-PCR relative to input and control IgG ( $n = 3$ ). **(E)**  
114 hMeDIP in HCC1806 cells transfected with shRNA against TET1, TET2, TET3 versus shcontrol cells  
115 under normoxia, followed by qRT-PCR relative to input and control IgG ( $n = 3$ ). **(F)** MeDIP in  
116 HCC1806 cells transfected with shRNA against TET1, TET2, TET3 versus shcontrol cells under  
117 normoxia, followed by qRT-PCR relative to input and control IgG ( $n = 3$ ). **(G)** Immunoblots of TET1,  
118 TET2, TET3, and ESRP1 protein expression in shTET1, shTET2, shTET3, and shcontrol HCC1806  
119 cells under normoxic condition. **(H and I)** Densitometric analysis of representative blots compared to  
120 shControl normalized to one. **(J)** Semi-quantitative PCR of *hMENA*, *SLK*, *SCRIB*, *RALGPS2*,  
121 *SLC37A2*, *FNIP1*, *CD44* and *ARHGEF1* after 48h of hypoxic treatment and TET3 knockdown in MCF7  
122 and HCC1806 cells (RPS16 used as a control). **(K)** Immunoblots of TET3 protein expression in MCF7  
123 and HCC1806 cells under normoxic vs hypoxic condition. **(L)** Densitometric analysis of representative  
124 blots compared to shControl normalized to one. Error bars show mean values  $\pm$  SD ( $n = 3$  unless  
125 otherwise specified) calculated using two-tailed Student's *t*-test, ns (non significant), \* $P < 0.05$ , \*\* $P <$   
126 0.01 and \*\*\* $P < 0.001$ .

127

128

129

130

131

132

133

134

135

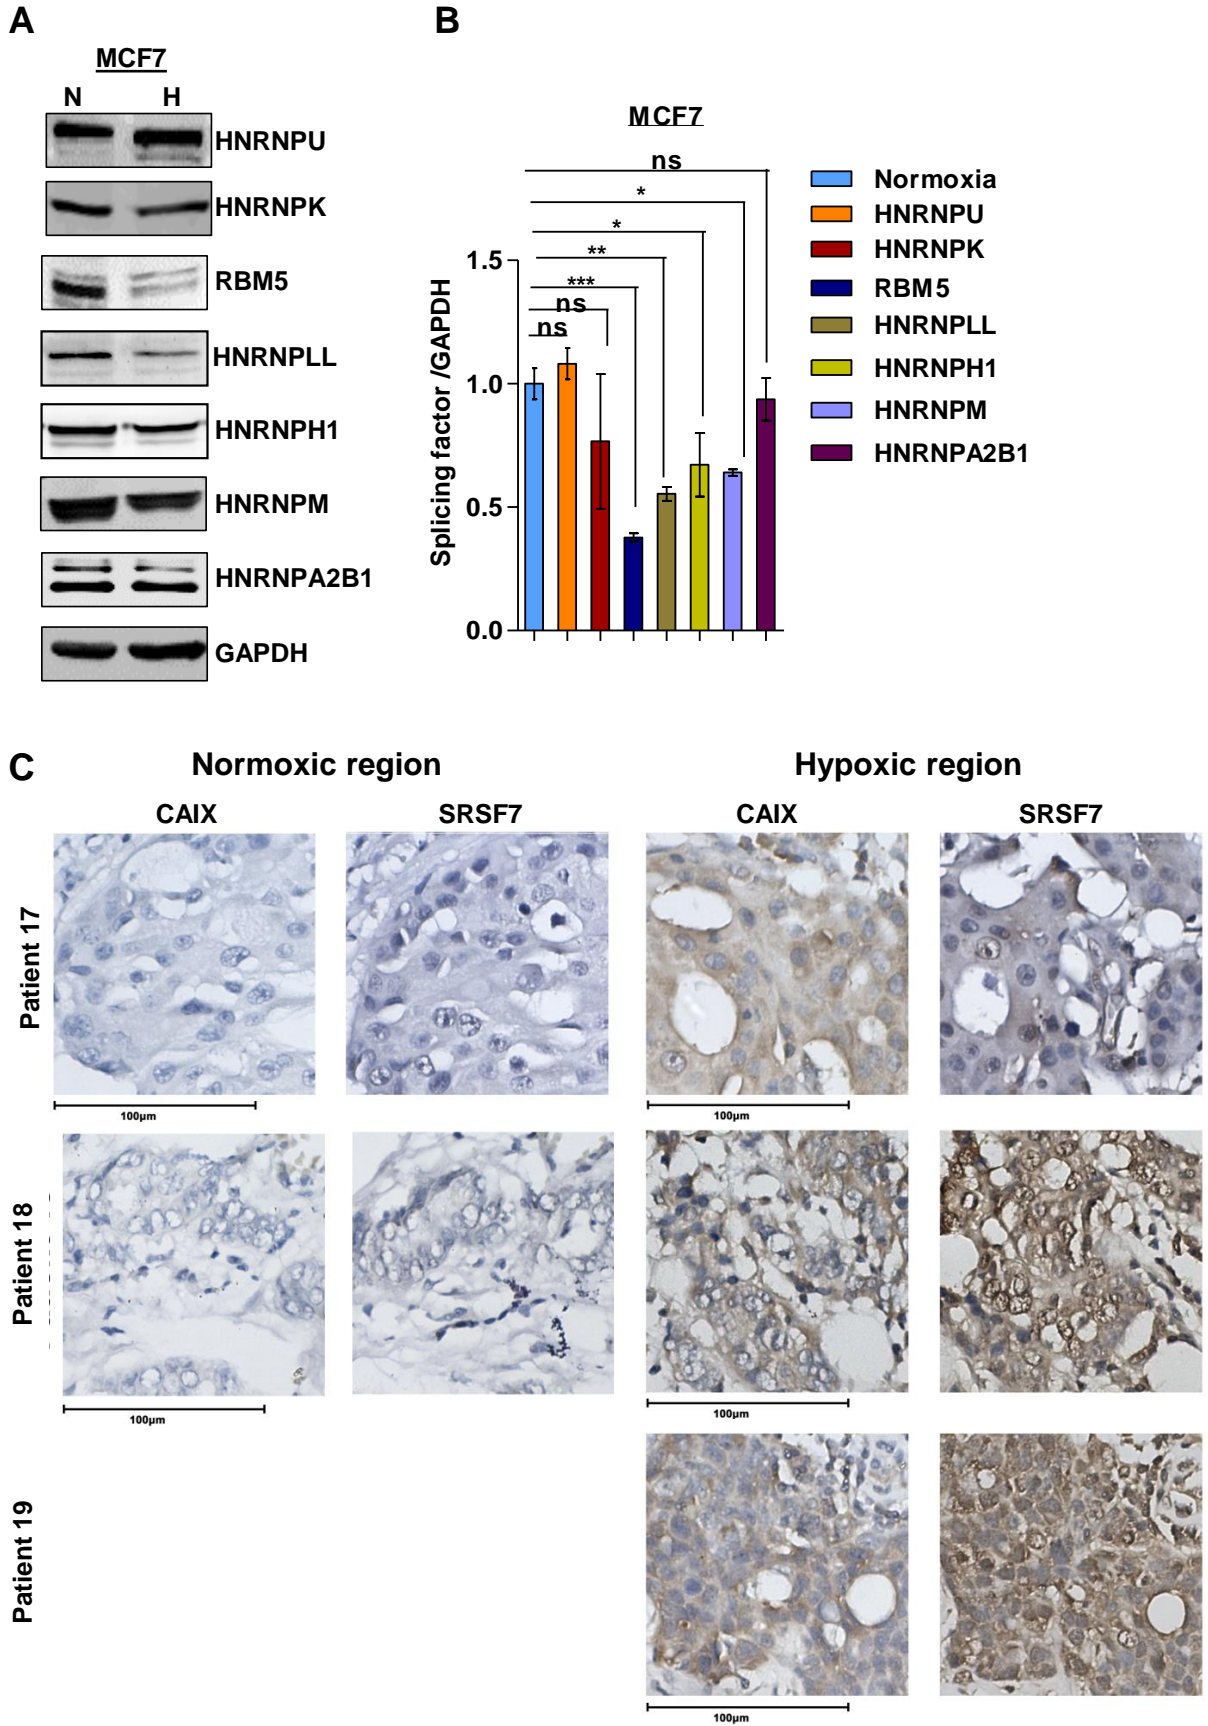

136 Supplementary Figure S5. E2F1 alters the cancer spliceome by inducing splicing factor SRSF7

137 **expression in hypoxic breast cancer cells. (A)** Immunoblots of HNRNPU, HNRNPK, RBM5,  
138 HNRNPLL, HNRNPH1, HNRNPM, HNRNPA2B1 in MCF7 (Normoxia versus Hypoxia). **(B)**  
139 Densitometric analysis of representative blots compared to normoxia normalized to one. **(C)** CAIX and  
140 SRSF7 immunostaining of three illustrative cases of breast cancer patients. Hypoxic regions: areas  
141 representing strong membranous and/or cytoplasmic immunostaining for CAIX also exhibit strong  
142 expression of SRSF7. Normoxic regions: areas representing weak/no immunostaining for CAIX also  
143 exhibit weak expression of SRSF7. Magnification: 40X. Error bars show mean values  $\pm$  SD ( $n = 3$   
144 unless otherwise specified) calculated using two-tailed Student's *t*-test, ns (non significant), \* $P < 0.05$ ,  
145 \*\* $P < 0.01$  and \*\*\* $P < 0.001$ .
